# Supplementary material for: Syntheses, structures, magnetic and photoluminescence properties of metal–organic frameworks based on aromatic polycarboxylate acids
Source: Royal Society of Chemistry journal article supplement (doi:10.1039/c0ce00490a), 2010-11-26
Supplement: c0ce00490a.pdf [file c0ce00490a.pdf]

## Supporting Information

### **Syntheses, structures, magnetic and photoluminescence properties of metal-organic frameworks based on aromatic polycarboxylate acids**

**Zhao-Rui Pan<sup>a,b</sup>, Jiao Xu<sup>a</sup>, Xiao-qiang Yao<sup>a</sup>, Yi-Zhi Li<sup>a</sup>, Zi-Jian Guo<sup>a</sup> and He-Gen Zheng<sup>\*a,c</sup>**

*<sup>a</sup>State Key Laboratory of Coordination Chemistry, School of Chemistry and Chemical Engineering, Nanjing National Laboratory of Microstructures, Nanjing University, Nanjing 210093, P. R. China.*

*<sup>b</sup> School of Biochemical and Environmental Engineering, Nanjing Xiaozhuang University, Nanjing 211171, P. R. China*

*<sup>c</sup>State Key Laboratory of Structural Chemistry, Fujian Institute of Research on the Structure of Matter, Chinese Academy of Sciences, Fuzhou 350002, P. R. China*

**Table S1 Selected Bond Distances (Å) and Angles (deg) for Compounds 1-3 (Co, Mn, and Cd).**

|             |            |              |            |
|-------------|------------|--------------|------------|
| Co compound |            |              |            |
| Co1—O1      | 2.0644(16) | Co1—O3a      | 2.0762(15) |
| Co1—O4b     | 2.1590(16) |              |            |
| O1—Co1—O1d  | 92.30(9)   | O1—Co1—O3c   | 176.83(6)  |
| O1—Co1—O3a  | 87.87(6)   | O3c—Co1—O3a  | 92.15(8)   |
| O1—Co1—O4e  | 83.17(6)   | O3c—Co1—O4e  | 93.66(6)   |
| O3a—Co1—O4e | 85.52(6)   | O1—Co1—O4f   | 97.65(6)   |
| O4e—Co1—O4f | 178.82(9)  |              |            |
| Mn compound |            |              |            |
| Mn1—O1      | 2.210(2)   | Mn1—O3       | 2.144(2)   |
| Mn1—O4      | 2.181(2)   |              |            |
| O3—Mn1—O1   | 95.03(8)   | O4—Mn1—O1    | 85.95(8)   |
| O3—Mn1—O4   | 179.01(13) | O3a—Mn1—O3   | 94.00(12)  |
| O3a—Mn1—O4  | 86.77(8)   | O4a—Mn1—O4   | 92.47(11)  |
| O3a—Mn1—O1  | 85.70(9)   | O4a—Mn1—O1   | 93.36(8)   |
| O1a—Mn1—O1  | 179.01(13) |              |            |
| Cd compound |            |              |            |
| Cd1—N2      | 2.331(3)   | Cd1a—O4      | 2.332(2)   |
| Cd1—O2      | 2.348(2)   | Cd1—N1       | 2.386(3)   |
| Cd1—O3      | 2.391(2)   | Cd1b—O4      | 2.401(2)   |
| Cd1a—O5     | 2.494(3)   |              |            |
| N2—Cd1—O4a  | 157.20(9)  | N2—Cd1—O2    | 89.40(10)  |
| O4a—Cd1—O2  | 102.18(9)  | N2—Cd1—N1    | 69.98(10)  |
| O4a—Cd1—N1  | 92.95(9)   | O2—Cd1—N1    | 154.55(9)  |
| N2—Cd1—O3   | 92.77(9)   | O4a—Cd1—O3   | 109.98(8)  |
| O2—Cd1—O3   | 55.03(8)   | N1—Cd1—O3    | 137.58(9)  |
| N2—Cd1—O4b  | 89.84(9)   | O4a—Cd1—O4b  | 72.17(9)   |
| O2—Cd1—O4b  | 84.12(8)   | N1—Cd1—O4b   | 81.18(9)   |
| O3—Cd1—O4b  | 139.00(8)  | N2—Cd1—O5a   | 134.29(10) |
| O4a—Cd1—O5a | 53.72(8)   | O2—Cd1—O5a   | 122.57(9)  |
| N1—Cd1—O5a  | 82.88(9)   | O3—Cd1—O5a   | 83.01(8)   |
| O4b—Cd1—O5a | 122.26(8)  | Cd1c—O4—Cd1b | 107.83(9)  |

Symmetry transformations used to generate equivalent atoms:

a = -x, -y, -z; b = -x + 1/2, -y + 1/2, z + 1/2. c = -x, -y, z - 1/2; d = -x, y, -z - 1/2;

e = -x + 1/2, -y + 1/2, z - 1/2; f = x - 1/2, -y + 1/2, -z. (Co compound **1**)

a = -x, y, -z + 3/2. (Mn compound **2**)

a = x - 1/2, -y + 1, z - 1/2; b = -x + 3/2, y, -z + 3/2; c = x - 1/2, -y + 2, z - 1/2. (Cd compound **3**)

**Table S2 Selected Bond Distances (Å) and Angles (deg) for compounds 4-6 (Eu, Nd, and Pr).**

|                  |            |                  |            |
|------------------|------------|------------------|------------|
| Eu compound      |            |                  |            |
| Eu1 — O3         | 2.359(7)   | Eu1 — O5         | 2.443(6)   |
| Eu1a — O2        | 2.446(6)   | Eu1b — O6        | 2.490(6)   |
| Eu1 — O7         | 2.524(7)   | Eu1c — O1        | 2.548(6)   |
| Eu1c — O2        | 2.587(6)   | O4d — Eu1        | 2.334(7)   |
| O4d — Eu1 — O3   | 85.9(2)    | O4d — Eu1 — O5   | 121.9(3)   |
| O3 — Eu1 — O5    | 74.8(2)    | O4d — Eu1 — O2a  | 81.0(2)    |
| O3 — Eu1 — O2a   | 132.3(2)   | O5 — Eu1 — O2a   | 74.2(2)    |
| O4d — Eu1 — O6b  | 81.1(2)    | O5 — Eu1 — O6b   | 135.8(2)   |
| O3 — Eu1 — O6b   | 148.8(2)   | O4d — Eu1 — O7   | 78.5(3)    |
| O2a — Eu1 — O6b  | 73.4(2)    | O3 — Eu1 — O7    | 77.6(2)    |
| O5 — Eu1 — O7    | 143.7(2)   | O2a — Eu1 — O7   | 142.0(2)   |
| O6b — Eu1 — O7   | 72.1(2)    | O4d — Eu1 — O1c  | 155.3(2)   |
| O3 — Eu1 — O1c   | 85.0(2)    | O5 — Eu1 — O1c   | 77.4(2)    |
| O2a — Eu1 — O1c  | 121.6(2)   | O6b — Eu1 — O1d  | 95.2(2)    |
| O7 — Eu1 — O1d   | 77.1(2)    | O4d — Eu1 — O2c  | 145.8(2)   |
| O3 — Eu1 — O2c   | 128.0(2)   | O5 — Eu1 — O2c   | 70.7(2)    |
| O2a — Eu1 — O2c  | 72.1(2)    | O6b — Eu1 — O2c  | 71.3(2)    |
| O7 — Eu1 — O2c   | 110.5(2)   | O1c — Eu1 — O2c  | 50.5(2)    |
| O4d — Eu1 — Eu1b | 115.57(19) | O5 — Eu1 — Eu1b  | 68.04(17)  |
| O3 — Eu1 — Eu1b  | 142.74(16) | O6b — Eu1 — Eu1b | 67.95(15)  |
| O2a — Eu1 — Eu1b | 37.23(14)  | O7 — Eu1 — Eu1b  | 134.1(2)   |
| O1c — Eu1 — Eu1b | 84.90(15)  | O2c — Eu1 — Eu1b | 34.89(13)  |
| Eu1e — O2 — Eu1c | 107.9(2)   |                  |            |
| Nd compound      |            |                  |            |
| Nd1a—O4          | 2.333(5)   | Nd1b—O3          | 2.335(5)   |
| Nd1c—O2          | 2.418(4)   | Nd1—O5           | 2.420(4)   |
| Nd1c—O6          | 2.472(4)   | Nd1—O7           | 2.496(6)   |
| Nd1—O1           | 2.534(4)   | Nd1—O2           | 2.589(4)   |
| O4d—Nd1          | 2.333(5)   | O4a—Nd1—O3b      | 85.47(17)  |
| O3b—Nd1—O2c      | 131.75(17) | O4a—Nd1—O2c      | 80.40(16)  |
| O4a—Nd1—O5       | 121.40(18) | O3b—Nd1—O5       | 74.49(17)  |
| O2c—Nd1—O5       | 74.37(16)  | O5—Nd1—O6c       | 136.25(16) |
| O4a—Nd1—O6c      | 81.28(17)  | O4a—Nd1—O7       | 78.65(19)  |
| O3b—Nd1—O6c      | 148.71(16) | O3b—Nd1—O7       | 77.82(19)  |
| O2c—Nd1—O6c      | 73.63(15)  | O2c—Nd1—O7       | 141.77(17) |
| O5—Nd1—O7        | 143.71(18) | O3b—Nd1—O1       | 85.13(16)  |
| O6c—Nd1—O7       | 71.85(18)  | O2c—Nd1—O1       | 122.41(14) |
| O4a—Nd1—O1       | 155.16(17) | O5—Nd1—O1        | 77.79(17)  |
| O6c—Nd1—O1       | 95.20(17)  | O5—Nd1—O2        | 70.77(16)  |

|              |            |              |            |
|--------------|------------|--------------|------------|
| O7—Nd1—O1    | 76.91(18)  | O6c—Nd1—O2   | 71.62(15)  |
| O4a—Nd1—O2   | 145.83(15) | O7—Nd1—O2    | 110.86(18) |
| O3b—Nd1—O2   | 128.19(15) | O1—Nd1—O2    | 50.99(14)  |
| O2c—Nd1—O2   | 72.39(16)  | O5—Nd1—O2    | 70.77(16)  |
| O4a—Nd1—Nd1c | 115.48(13) | O3b—Nd1—Nd1c | 142.60(13) |
| O2c—Nd1—Nd1c | 37.62(10)  | O6c—Nd1—Nd1c | 68.25(11)  |
| O5—Nd1—Nd1c  | 68.16(11)  | O7c—Nd1—Nd1  | 134.27(15) |
| O1c—Nd1—Nd1  | 85.27(10)  | O2c—Nd1—Nd1  | 34.76(10)  |
| Nd1c—O2—Nd1  | 107.61(16) |              |            |
| Pr compound  |            |              |            |
| O1—Pr1       | 2.292(5)   | O3—Pr1       | 2.421(5)   |
| O2—Pr1       | 2.445(6)   | O4—Pr1       | 2.371(5)   |
| O5a—Pr1      | 2.493(5)   | O8b—Pr1      | 2.282(5)   |
| O7a—Pr1      | 2.546(5)   | Pr1c—O7      | 2.375(5)   |
| Pr1d—O7—Pr1a | 107.66(18) | O1—Pr1—O4    | 74.07(19)  |
| O8b—Pr1—O1   | 85.34(19)  | O8b—Pr1—O7   | 80.52(18)  |
| O8b—Pr1—O4   | 120.7(2)   | O1—Pr1—O7    | 131.69(19) |
| O4—Pr1—O7c   | 74.33(18)  | O4—Pr1—O3    | 136.95(18) |
| O8b—Pr1—O3   | 81.62(19)  | O7c—Pr1—O3   | 74.16(17)  |
| O1—Pr1—O3    | 148.40(18) | O8b—Pr1—O2   | 79.3(2)    |
| O1—Pr1—O2    | 77.2(2)    | O8b—Pr1—O5a  | 155.04(19) |
| O4—Pr1—O2    | 142.8(2)   | O1—Pr1—O5a   | 84.14(18)  |
| O7c—Pr1—O2   | 142.75(19) | O4—Pr1—O5a   | 77.69(19)  |
| O3—Pr1—O2    | 72.2(2)    | O7c—Pr1—O5a  | 122.89(16) |
| O3—Pr1—O5a   | 95.84(18)  | O4—Pr1—O7a   | 71.37(18)  |
| O2—Pr1—O5a   | 76.4(2)    | O7c—Pr1—O7a  | 72.34(18)  |
| O8b—Pr1—O7a  | 145.96(17) | O3—Pr1—O7a   | 71.60(17)  |
| O1—Pr1—O7a   | 128.18(17) | O2—Pr1—O7a   | 110.77(19) |
| O5a—Pr1—O7a  | 51.71(15)  | O4—Pr1—Pr1e  | 68.52(13)  |
| O8b—Pr1—Pr1e | 115.63(14) | O7c—Pr1—Pr1e | 37.63(11)  |
| O1—Pr1—Pr1e  | 142.52(14) | O3—Pr1—Pr1e  | 68.57(12)  |
| O2—Pr1—Pr1e  | 134.66(16) | O7a—Pr1—Pr1e | 34.72(11)  |
| O5a—Pr1—Pr1e | 85.84(11)  |              |            |

Symmetry transformations used to generate equivalent atoms:

$a = x + 1/2, -y + 1/2, z - 1/2$ ;  $b = -x + 5/2, -y + 1/2, -z + 1$ ;  $c = -x + 2, y, -z + 3/2$ ;

$d = -x + 2, y, -z + 1/2$ ;  $e = x - 1/2, -y + 1/2, z + 1/2$ . (Eu compound **4**)

$a = x, y, z - 1$ ;  $b = -x, y, -z + 3/2$ ;  $c = -x + 1/2, -y + 1/2, -z + 1$ ;  $d = x, y, z + 1$ . (Nd compound **5**)

$a = -x, y, -z + 1/2$ ;  $b = -x, y, -z - 1/2$ ;  $c = x + 1/2, -y + 1/2, z - 1/2$ ;  $d = x - 1/2, -y + 1/2, z + 1/2$ ;  $e = -x + 1/2, -y + 1/2, -z$ . (Pr compound **6**)

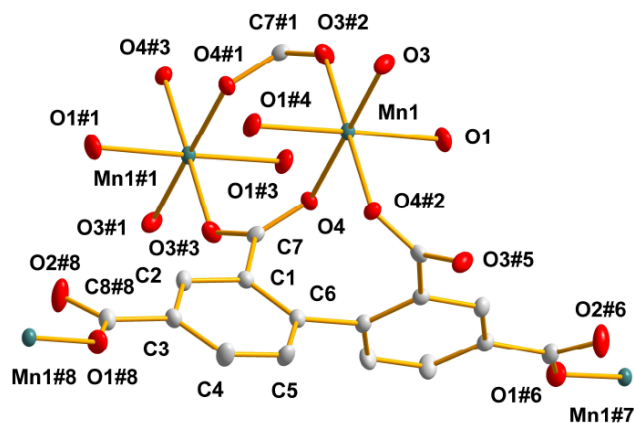

**Figure S1.** An ORTEP drawing of Mn compound **2** showing 30% ellipsoid probability (hydrogen atoms are omitted for clarity). Symmetry codes: #1=  $-x, 2-y, 2-z$ ; #2=  $-x, y, 1.5-z$ ; #3=  $x, 2-y, 0.5+z$ ; #4=  $-x, y, 1.5-z$ ; #5=  $-x, 2-y, 1-z$ ; #6=  $-0.5-x, -0.5+y, z$ ; #7=  $-0.5+x, -0.5+y, 1.5-z$ ; #8=  $0.5+x, -0.5+y, 1.5-z$ .

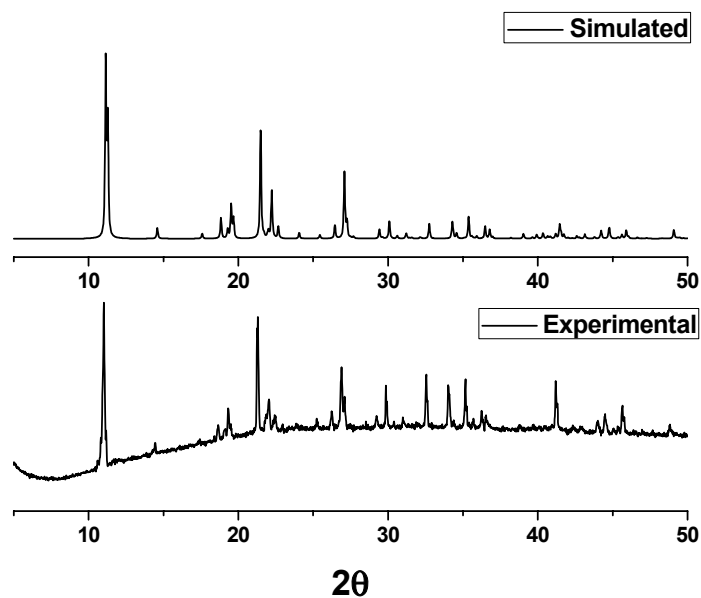

**Figure S2.** Experimental (bottom) and simulated (top) powder X-ray diffraction patterns of Co compound **1** at 293K.

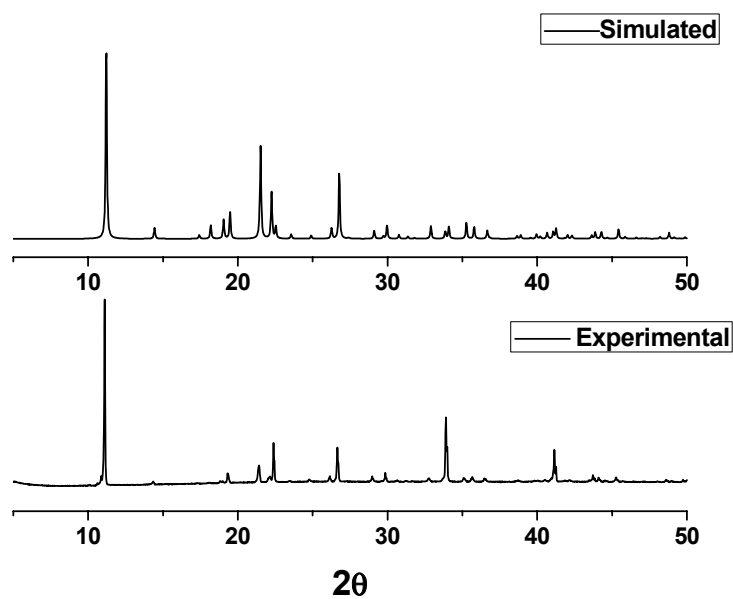

**Figure S3.** Experimental (bottom) and simulated (top) powder X-ray diffraction patterns of Mn compound **2** at 293K.

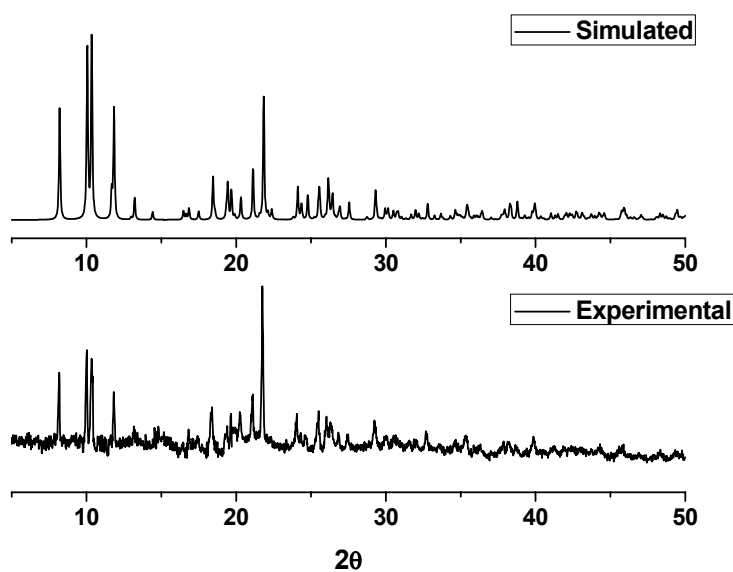

**Figure S4.** Experimental (bottom) and simulated (top) powder X-ray diffraction patterns of Cd compound **3** at 293K.

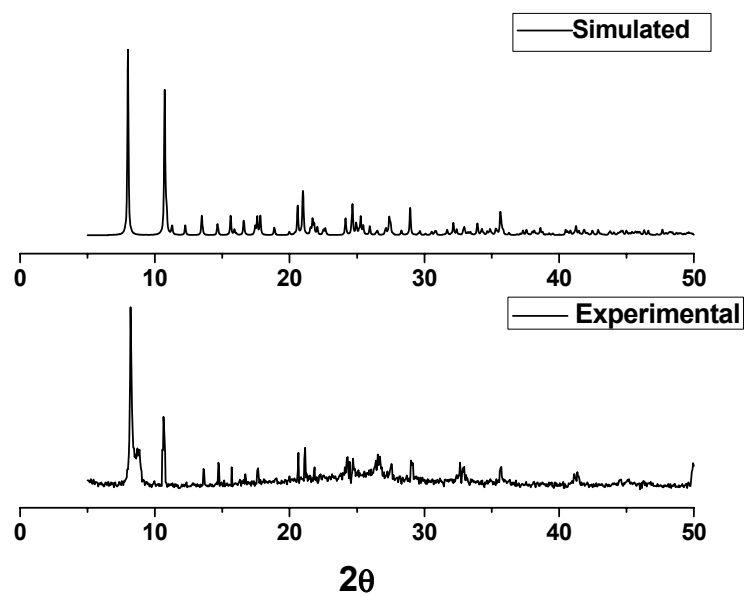

**Figure S5.** Experimental (bottom) and simulated (top) powder X-ray diffraction patterns of Eu compound **4** at 293K.

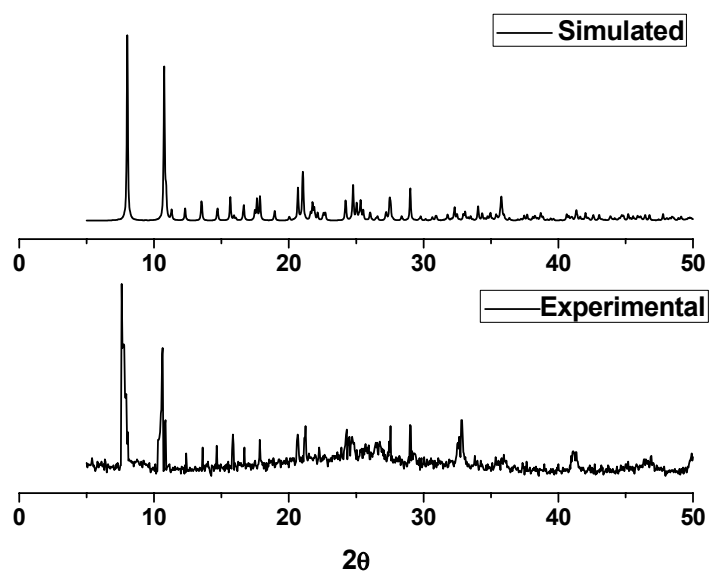

**Figure S6.** Experimental (bottom) and simulated (top) powder X-ray diffraction patterns of Nd compound **5** at 293K.

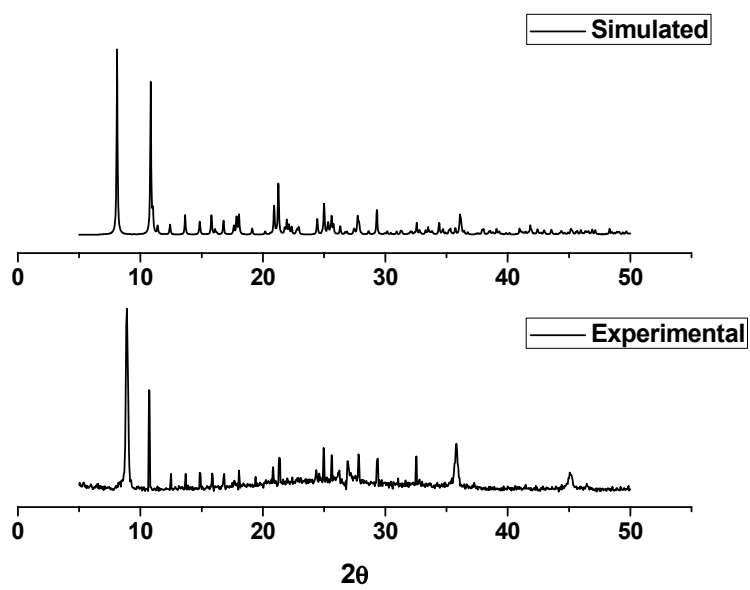

**Figure S7.** Experimental (bottom) and simulated (top) powder X-ray diffraction patterns of Pr compound **6** at 293K.
